# Supplementary material for: Improved photoluminescence and sensing stability of porous silicon nanowires by surface passivation
Source: Royal Society of Chemistry journal article supplement (doi:10.1039/c3cp53952k), 2013-11-04
Supplement: c3cp53952k.pdf [file c3cp53952k.pdf]

## Supplementary Information

# Improved Photoluminescence and Sensing Stability of Porous Silicon Nanowires by Surface Passivation

Lu Gan, Luwei Sun, Haping He\*, Zhizhen Ye

State Key Laboratory of Silicon Materials, Department of Materials Science and Engineering,  
Zhejiang University, Hangzhou 310027, People's Republic of China

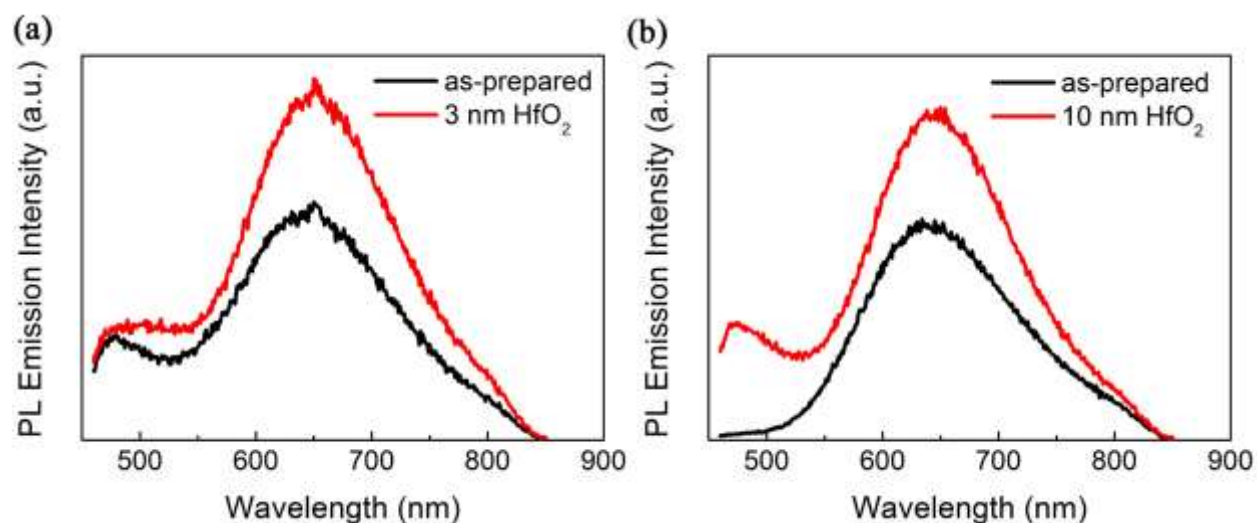

**Figure S1.** Room temperature PL spectra of the as-prepared and HfO<sub>2</sub>-coated porous Si NWs with different coating thickness: (a) 3 nm, and (b) 10 nm.
